# Supplementary material for: Doxycycline Impairs Mitochondrial Function and Protects Human Glioma Cells from Hypoxia-Induced Cell Death: Implications of Using Tet-Inducible Systems
Source: MDPI journal article supplement (doi:10.3390/ijms19051504), 2018-05-17
Supplement: s1 [file s1]

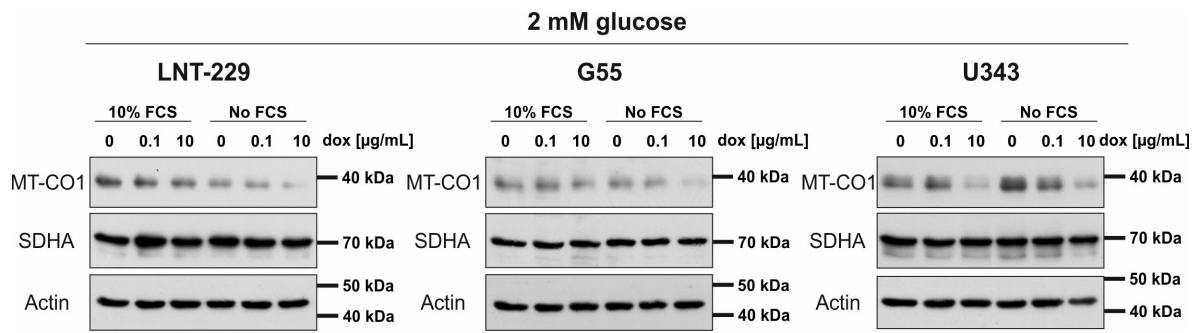

**Figure S1: Doxycycline causes mitonuclear protein imbalance in glioma cells under low glucose conditions.** LNT-229, G55 and U343 glioma cells were incubated in serum containing (10% FCS) or serum-free (No FCS) medium with glucose restriction (2 mM glucose) with vehicle, 0.1 or 10  $\mu$ g/ml doxycycline under normoxic conditions for 24 h as indicated. Cellular lysates were analyzed by immunoblot with antibodies for MT-CO1, SDHA and actin.
